# Supplementary material
Source: Springer Nature journal article supplement (https://www.springermedizin.de/resource/supplementary/12916_2006_96_MOESM6_ESM.pdf/9599160)

**Control graph**

*Illustration D: Rates of YLLs by Rurality Status, Sex and Major Causes of Death*

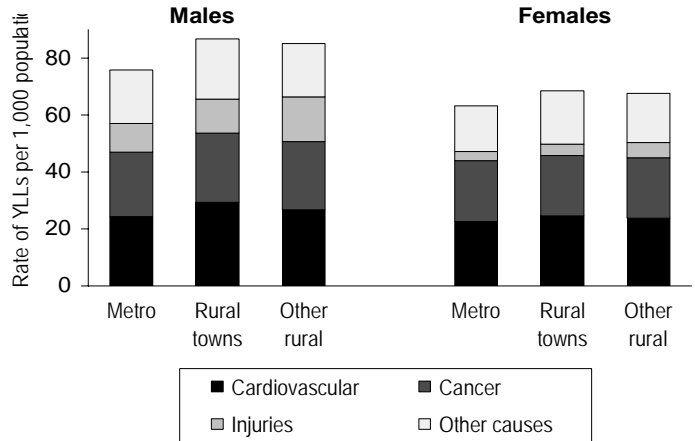

**Intervention graph**

*Illustration D: Rates of YLLs by Rurality, Status and Sex*

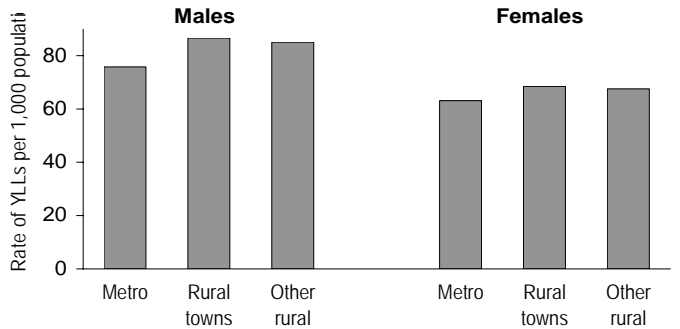

Supplement: MOESM6 [file 9599160]
